# Supplementary material for: Calf Circumference as a Predictive Biomarker for Falls in older Adults: A Retrospective Case– Control Study
Source: Research Square preprint supplement (doi:10.21203/rs.3.rs-7839117/v1), 2025-11-25
Supplement: Supplementary file 1 [file 3c9022426843d9e0ff7b2e24.docx]

**Table 1. Demographic and Clinical Characteristics of Case (Fallers) and Control (Non-Fallers) Group**

| **Variable** | **Fallers (n=266)** | **Non-Fallers (n=798)** | **p-value** |
| --- | --- | --- | --- |
| ***Age (years, mean ± SD)*** | 79.30 ± 9.54 | 72.70 ± 8.34 | <0.001 |
| ***Gender*** |  |  | <0.001 |
| Male | 95 (35.71%) | 361 (45.24%) |  |
| Female | 171 (64.29%) | 437 (54.76%) |  |
| ***Marital Status*** |  |  | <0.001 |
| Married | 124 (46.62%) | 228 (28.57%) |  |
| Unmarried | 142 (53.38%) | 570 (71.43%) |  |
| ***Employed*** |  |  | 0.06 |
| Yes | 187 (89.47%) | 446 (84.15%) |  |
| No | 22 (10.53%) | 84 (15.85%) |  |
| ***Education*** |  |  | <0.001 |
| High school and less | 202 (75.94%) | 463 (58.02%) |  |
| Undergraduate | 44 (16.54%) | 249 (31.20%) |  |
| Postgraduate | 20 (7.52%) | 86 (10.78%) |  |
| ***Calf Circumference*** |  |  | <0.001 |
| ≥ 31 cm | 106 (39.85%) | 200 (25.06%) |  |
| < 31 cm | 160 (60.15%) | 598 (74.94%) |  |
| ***BMI (kg/m², mean ± SD)*** | 23.80 ± 4.80 | 24.96 ± 4.50 | <0.001 |
| ***Limb muscle strength*** |  |  | <0.001 |
| Yes | 15 (9.74%) | 21 (3.42%) |  |
| No | 139 (90.26%) | 593 (96.58%) |  |
| ***Cerebellar function*** |  |  | <0.001 |
| Yes | 11 (7.80%) | 5 (0.86%) |  |
| No | 130 (92.20%) | 574 (99.14%) |  |
| ***Foot examination*** |  |  | <0.001 |
| Yes | 15 (10.71%) | 13 (2.26%) |  |
| No | 125 (89.29%) | 562 (97.74%) |  |
| ***Statin Use*** |  |  | <0.001 |
| Yes | 150 (69.44%) | 422 (58.94%) |  |
| No | 66 (30.56%) | 294 (41.06%) |  |
| ***Aspirin Use*** |  |  | <0.001 |
| Yes | 133 (62.74%) | 363 (50.77%) |  |
| No | 79 (37.26%) | 352 (49.23%) |  |
| ***Smoking*** |  |  | 0.73 |
| Current | 249 (94.32%) | 748 (93.73%) |  |
| Never/Former | 15 (5.68%) | 50 (6.27%) |  |
| ***Physical Activation*** |  |  | <0.001 |
| Yes | 148 (65.78%) | 291 (40.64%) |  |
| No | 77 (34.22%) | 425 (59.36%) |  |
| ***Diabetes*** |  |  | 0.90 |
| Yes | 71 (26.69%) | 210 (26.32%) |  |
| No | 195 (73.31%) | 588 (73.68%) |  |
| ***Hypertension*** |  |  | <0.001 |
| Yes | 203 (76.3%) | 523 (65.5%) |  |
| No | 63 (23.7%) | 275 (34.5%) |  |
| ***Dyslipidemia*** |  |  | 0.20 |
| Yes | 22 (8.3%) | 88 (11.0%) |  |
| No | 244 (91.7%) | 710 (89.0%) |  |
| ***CVD*** |  |  | 0.56 |
| Yes | 15 (5.6%) | 53 (6.6%) |  |
| No | 251 (94.4%) | 745 (93.4%) |  |
| ***Obesity*** |  |  | 0.47 |
| Yes | 16 (6.0%) | 39 (4.9%) |  |
| No | 250 (94.0%) | 759 (95.1%) |  |
