# Supplementary material for: Calf Circumference as a Predictive Biomarker for Falls in older Adults: A Retrospective Case– Control Study
Source: Research Square preprint supplement (doi:10.21203/rs.3.rs-7839117/v1), 2025-11-25
Supplement: Supplementary file 2 [file 40ffa3b94e091cba2efdbb0f.docx]

**Table 2. Logistic Regression Analysis of Variables Associated with Fall Risk**

| **Variable** | **Unadjusted OR (95% CI)** | **p-value** |
| --- | --- | --- |
| Calf Circumference (≥ 31 cm vs. <31 cm) | 0.50 (0.37–0.67) | <0.001 |
| Age (per year) | 1.08 (1.06–1.10) | <0.001 |
| BMI (per kg/m²) | 0.94 (0.91–0.97) | <0.001 |
| Gender (Female vs. Male) | 1.48 (1.11–1.98) | <0.0010 |
| Marital Status (Married vs. Unmarried) | 2.18 (1.64–2.90) | <0.001 |
| Employed (Yes vs. No) | 1.60 (0.97–2.63) | 0.06 |
| Education Level (Undergraduate and less vs. High school) | 0.40 (0.28–0.58) | <0.001 |
| Education Level (postgraduate and less vs. High school) | 0.53(0.31–0.89) | <0.001 |
| Limb muscle strength (Yes vs. No) | 3.04 (1.53–6.06) | <0.001 |
| Cerebellar function (Yes vs. No) | 9.71(3.31–28.43) | <0.001 |
| Foot examination (Yes vs. No) | 5.18(2.40–11.17) | <0.001 |
| Statin Use (Yes vs. No) | 1.58(1.14–2.19) | <0.001 |
| Aspirin Use (Yes vs. No) | 1.63(1.192–2.23) | <0.001 |
| Smoking (Current vs. Never/Former) | 1.11(0.612–2.01) | 0.73 |
| Physical Activation (Yes vs. No) | 2.80(2.05–3.84) | <0.001 |
| Diabetes (Yes vs. No) | 1.01(0.74–1.39) | 0.90 |
| Hypertension (Yes vs. No) | 1.69(1.23–2.32) | <0.001 |
| Dyslipidemia (Yes vs. No) | 0.72(0.44–1.18) | 0.20 |
| CVD (Yes vs. No) | 0.84(0.46–1.51) | 0.56 |
| Obesity (Yes vs. No) | 1.24(0.68–2.26) | 0.47 |
