# Supplementary material for: Calf Circumference as a Predictive Biomarker for Falls in older Adults: A Retrospective Case– Control Study
Source: Research Square preprint supplement (doi:10.21203/rs.3.rs-7839117/v1), 2025-11-25
Supplement: Supplementary file 3 [file bb5b3a3ccc45de830e98bed6.docx]

**Table 3. Multiple Logistic Regression Analysis for Fall Risk**

| **Variable** | **adjusted OR (95% CI)** | **p-value** |
| --- | --- | --- |
| Calf Circumference (≥ 31 cm vs. <31 cm) | 0.54(0.33–0.90) | 0.01 |
| Age (per year) | 1.10(1.05-1.11) | 0.10 |
| Gender (Female vs. Male) | 1.44(0.87–2.37) | 0.15 |
| Limb muscle strength (Yes vs. No) | 1.94(0.74–5.04) | 0.17 |
| Cerebellar function (Yes vs. No) | 4.16(0.98–17.71) | 0.05 |
| Foot examination (Yes vs. No) | 2.12(0.69–6.52) | 0.18 |
| Statin Use (Yes vs. No) | 0.83(0.43–1.62) | 0.59 |
| Aspirin Use (Yes vs. No) | 1.34(0.70–2.58) | 0.36 |
| Smoking (Current vs. Never/Former) | 0.87(0.32–2.39) | 0.79 |
| Physical Activation (Yes vs. No) | 3.57(2.19–5.83) | <0.001 |
| Diabetes (Yes vs. No) | 1.01(0.59–1.71) | 0.96 |
| Hypertension (Yes vs. No) | 1.46(0.64–3.30) | 0.36 |
| Dyslipidemia (Yes vs. No) | 0.69(0.21–2.31) | 0.55 |
| CVD (Yes vs. No) | 0.84(0.33–2.12) | 0.72 |
| Obesity (Yes vs. No) | 1.74(0.65–4.66) | 0.26 |
